# Supplementary material for: A Comparative Study of Composition and Soluble Polysaccharide Content between Brewer’s Spent Yeast and Cultured Yeast Cells
Source: MDPI journal article supplement (doi:10.3390/foods13101567), 2024-05-17
Supplement: s1 [file s1]

## Supplementary Data

**Table S1. Insoluble polysaccharide of alkali extraction derived from autolysate residue.**

| Samples | $\beta$ -glucan<br>(as glucose) | Mannan/Mannoprotein (as<br>mannose) | Chitin<br>(as <i>N</i> -acetyl-glucosamine) |
|---------|---------------------------------|-------------------------------------|---------------------------------------------|
| BSY     | 778.50 $\pm$ 20.25 <sup>a</sup> | 41.50 $\pm$ 0.99 <sup>c</sup>       | 3.61 $\pm$ 0.11 <sup>c</sup>                |
| SC      | 631.86 $\pm$ 14.25 <sup>c</sup> | 61.78 $\pm$ 1.63 <sup>a</sup>       | 36.29 $\pm$ 0.12 <sup>a</sup>               |
| SB      | 697.80 $\pm$ 10.13 <sup>b</sup> | 58.86 $\pm$ 1.63 <sup>b</sup>       | 23.13 $\pm$ 0.15 <sup>b</sup>               |

BSY, Brewer's spent yeast, SC: *S. cerevisiae*; SB: *S. boulardii*. Values are means  $\pm$  SD (n = 3). \*Means with different superscript in the same column are significantly different  $p < 0.05$ .
